# Supplementary material for: Exploring the social and cultural aspects of Chinese family caregivers’ experience as they support loved ones with dementia transitioning into nursing homes: a qualitative study protocol
Source: HighWire-hosted journal article supplement (doi:10.1136/bmjopen-2024-085731), 2024-08-01
Supplement: bmjopen-2024-085731supp003_data_supplement.pdf [file bmjopen-2024-085731supp003_data_supplement.pdf]

**Exploring the Social and Cultural Aspects of Chinese Family Caregivers' Experience as They Support Loved Ones with Dementia Transitioning into Nursing Homes: A Qualitative Study Protocol.**

***Supplemental Material 3***

**\*This document contains the text version of the Background Questionnaire in English (Page 2-6) and translated to Simplified Chinese (Page 7-12) and Traditional Chinese (Page 13-18) hosted in REDCap.**

*(Remainder of page intentionally left blank. Please continue to the next page.)*

### Background Questionnaire

Thank you for participating in the interview! Now, we are going to collect some basic background information about you and your loved one with dementia to better understand your experiences.

#### Section I: Information about you

|                                                                   |                                                                                                                                                                                                                                                                                     |
|-------------------------------------------------------------------|-------------------------------------------------------------------------------------------------------------------------------------------------------------------------------------------------------------------------------------------------------------------------------------|
| <b>What is your age?</b>                                          | <i>(Fill in the blank)</i><br><br>[ ] years                                                                                                                                                                                                                                         |
| <b>What is your marital status?</b>                               | <i>(Choose only one)</i><br><br>[ ] Married/partnered<br>[ ] Not married<br>[ ] Widowed<br>[ ] Separated<br>[ ] Divorced<br>[ ] Prefer not to answer                                                                                                                                |
| <b>What is your highest level of education?</b>                   | <i>(Choose only one)</i><br><br>[ ] Less than high school<br>[ ] High school graduate/GED or equivalent<br>[ ] Some college, no degree/Associate degree<br>[ ] Bachelor's degree<br>[ ] Graduate degree or professional school degree<br>[ ] Prefer not to answer<br>[ ] Don't know |
| <b>What is your current employment status?</b>                    | <i>(Choose only one)</i><br><br>[ ] Work Full-time<br>[ ] Work Part-time<br>[ ] Not employed but seeking opportunities<br>[ ] Not employed outside the home<br>[ ] Retired<br>[ ] Prefer not to answer<br>[ ] Other, please specify: [ ]                                            |
| <b>What is your total household income in the past 12 months?</b> | <i>(Choose only one)</i><br><br>[ ] < \$35,000<br>[ ] \$35,000 - \$99,999<br>[ ] > \$100,000                                                                                                                                                                                        |

|                                                                                           |                                                                                                                                                                                                                                                                                                                                                                                                                                                      |
|-------------------------------------------------------------------------------------------|------------------------------------------------------------------------------------------------------------------------------------------------------------------------------------------------------------------------------------------------------------------------------------------------------------------------------------------------------------------------------------------------------------------------------------------------------|
|                                                                                           | <input type="checkbox"/> Prefer not to answer<br><input type="checkbox"/> Don't know                                                                                                                                                                                                                                                                                                                                                                 |
| <b>How many years have you lived in the U.S.?</b>                                         | <i>(Fill in the blank)</i><br><br><input type="checkbox"/> years                                                                                                                                                                                                                                                                                                                                                                                     |
| <b>Which of the following best describes your background?</b>                             | <i>(Choose only one)</i><br><br><input type="checkbox"/> I was born in the U.S. and lived here for most of my life.<br><input type="checkbox"/> I was born in the U.S., but grew up outside of the U.S. before I returned to live in the U.S.<br><input type="checkbox"/> I was born outside of the U.S. and relocated to the U.S. for family/study/work/other purposes.<br><input type="checkbox"/> Other, please specify: <input type="checkbox"/> |
| <b>What was your primary language growing up?</b>                                         | <input type="checkbox"/> Chinese<br><input type="checkbox"/> English<br><input type="checkbox"/> Both Chinese and English equally<br><input type="checkbox"/> Another language: <input type="checkbox"/>                                                                                                                                                                                                                                             |
| <b>What is the primary language you use now to communicate with healthcare providers?</b> | <i>(Choose only one)</i><br><br><input type="checkbox"/> Chinese<br><input type="checkbox"/> English<br><input type="checkbox"/> Both Chinese and English equally<br><input type="checkbox"/> Another language, please specify: <input type="checkbox"/>                                                                                                                                                                                             |

### Section II: Information about your loved one with dementia

|                                                 |                                                                                                                                                                                                                                                                                    |
|-------------------------------------------------|------------------------------------------------------------------------------------------------------------------------------------------------------------------------------------------------------------------------------------------------------------------------------------|
| <b>What is your loved one's age?</b>            | <i>(Fill in the blank)</i><br><br><input type="checkbox"/> years                                                                                                                                                                                                                   |
| <b>What is your loved one's marital status?</b> | <i>(Choose only one)</i><br><br><input type="checkbox"/> Married/partnered<br><input type="checkbox"/> Not married<br><input type="checkbox"/> Widowed<br><input type="checkbox"/> Separated<br><input type="checkbox"/> Divorced<br><input type="checkbox"/> Prefer not to answer |

|                                                                    |                                                                                                                                                                                                                                                                                                                                                                                                                                                                                                      |
|--------------------------------------------------------------------|------------------------------------------------------------------------------------------------------------------------------------------------------------------------------------------------------------------------------------------------------------------------------------------------------------------------------------------------------------------------------------------------------------------------------------------------------------------------------------------------------|
| <b>What is their highest level of education?</b>                   | <p><i>(Choose only one)</i></p> <p><input type="checkbox"/> Less than high school</p> <p><input type="checkbox"/> High school graduate/GED or equivalent</p> <p><input type="checkbox"/> Some college, no degree/Associate degree</p> <p><input type="checkbox"/> Bachelor's degree</p> <p><input type="checkbox"/> Graduate degree or professional school degree</p> <p><input type="checkbox"/> Prefer not to answer</p> <p><input type="checkbox"/> Don't know</p>                                |
| <b>What is their current employment status?</b>                    | <p><i>(Choose only one)</i></p> <p><input type="checkbox"/> Work Full-time</p> <p><input type="checkbox"/> Work Part-time</p> <p><input type="checkbox"/> Not employed but seeking opportunities</p> <p><input type="checkbox"/> Not employed outside the home</p> <p><input type="checkbox"/> Retired</p> <p><input type="checkbox"/> Prefer not to answer</p> <p><input type="checkbox"/> Other, please specify: <input type="checkbox"/></p>                                                      |
| <b>What is their total household income in the past 12 months?</b> | <p><i>(Choose only one)</i></p> <p><input type="checkbox"/> &lt; \$35,000</p> <p><input type="checkbox"/> \$35,000 - \$99,999</p> <p><input type="checkbox"/> &gt; \$100,000</p> <p><input type="checkbox"/> Prefer not to answer</p> <p><input type="checkbox"/> Don't know</p>                                                                                                                                                                                                                     |
| <b>How many years have they lived in the U.S.?</b>                 | <p><i>(Fill in the blank)</i></p> <p><input type="checkbox"/> years</p>                                                                                                                                                                                                                                                                                                                                                                                                                              |
| <b>Which of the following best describe their background?</b>      | <p><i>(Choose only one)</i></p> <p><input type="checkbox"/> He/she/they was born in the U.S. and lived here for most their life.</p> <p><input type="checkbox"/> He/she/they was born in the U.S., but grew up outside of the U.S. before returning to live in the U.S.</p> <p><input type="checkbox"/> He/she/they was born outside of the U.S. and relocated to the U.S. for family/study/work/other purposes.</p> <p><input type="checkbox"/> Other, please specify: <input type="checkbox"/></p> |
| <b>What was their primary language growing up?</b>                 | <p><i>(Choose only one)</i></p> <p><input type="checkbox"/> Chinese</p>                                                                                                                                                                                                                                                                                                                                                                                                                              |

|                                                                          |                                                                                                                                                                                                                                                                                                              |
|--------------------------------------------------------------------------|--------------------------------------------------------------------------------------------------------------------------------------------------------------------------------------------------------------------------------------------------------------------------------------------------------------|
|                                                                          | <input type="checkbox"/> English<br><input type="checkbox"/> Both Chinese and English equally<br><input type="checkbox"/> Another language, please specify: [ ]                                                                                                                                              |
| <b>What kind of health insurance does your loved one currently have?</b> | <i>(Choose all that apply)</i><br><input type="checkbox"/> Medicare<br><input type="checkbox"/> Medicaid<br><input type="checkbox"/> Long-term health insurance<br><input type="checkbox"/> Private insurance<br><input type="checkbox"/> Not insured<br><input type="checkbox"/> Other, please specify: [ ] |

Thank you very much for completing the Background Questionnaire!

Your efforts and support for your loved one with dementia are highly valued and appreciated. If you would like to receive a summary of the study findings, please check the box below, and we will contact you when the summary is ready.

**I would like to receive a summary of the study findings.**

Thank you for participating in the CARING Study. We wish you and your loved one all the best.

[EXIT QUESTIONNAIRE]

### 背景问卷 (简体中文版)

感谢您参与访谈！现在，为了更深入地了解您的经历，我们将询问您一些关于您和您患有失智症亲人的背景信息。

#### 第一部分：关于您的信息

|             |                                                                                                                                       |
|-------------|---------------------------------------------------------------------------------------------------------------------------------------|
| 请问您的年龄是？    | (请填空)<br><br>[] 岁                                                                                                                     |
| 请问您的婚姻状况是？  | (请只选择一项)<br><br>[] 已婚，或有固定伴侣<br>[] 未婚<br>[] 丧偶<br>[] 分居<br>[] 离异<br>[] 不希望回答                                                          |
| 请问您的受教育程度是？ | (请只选择一项)<br><br>[] 高中以下<br>[] 高中学历，普通教育发展证书 (GED) 或其他同等文凭<br>[] 读过大学未毕业，或副学士学位<br>[] 本科学位<br>[] 研究生学位、博士学位或专业学位<br>[] 不希望回答<br>[] 不清楚 |
| 您目前的工作状况是？  | (请只选择一项)<br><br>[] 全职工作                                                                                                               |

|                                  |                                                                                                                                                                                                                                 |
|----------------------------------|---------------------------------------------------------------------------------------------------------------------------------------------------------------------------------------------------------------------------------|
|                                  | <input type="checkbox"/> 兼职工作<br><input type="checkbox"/> 没有工作, 但正在找工作<br><input type="checkbox"/> 在家庭之外没有工作<br><input type="checkbox"/> 已退休<br><input type="checkbox"/> 不希望回答<br><input type="checkbox"/> 其他, 请详述: _____       |
| <b>在过去的 12 个月中, 您的总家庭收入大约多少?</b> | <i>(请只选择一项)</i><br><input type="checkbox"/> < \$35,000<br><input type="checkbox"/> \$35,000 - \$99,999<br><input type="checkbox"/> > \$100,000<br><input type="checkbox"/> 不希望回答<br><input type="checkbox"/> 不清楚                |
| <b>请问您已经在美国居住了多少年?</b>           | <i>(请填空)</i><br><input type="text"/> 年                                                                                                                                                                                          |
| <b>哪一项最能描述您的背景?</b>              | <i>(请只选择一项)</i><br><input type="checkbox"/> 我出生在美国, 并且绝大多数时间居住于此<br><input type="checkbox"/> 我出生在美国, 但我成长在美国之外, 之后才回到美国生活<br><input type="checkbox"/> 我出生在美国之外, 后来因家庭、学业、工作或其他原因来到美国<br><input type="checkbox"/> 其他, 请详述: _____ |
| <b>成长过程中, 您主要使用的是哪种语言?</b>       | <i>(请只选择一项)</i><br><input type="checkbox"/> 中文<br><input type="checkbox"/> 英文<br><input type="checkbox"/> 中英文都用<br><input type="checkbox"/> 其他语言, 请详述: _____                                                                    |

|                              |                                                                                                                                                                             |
|------------------------------|-----------------------------------------------------------------------------------------------------------------------------------------------------------------------------|
| <b>您与医护人员交流时，主要使用的是哪种语言？</b> | <p>(请只选择一项)</p> <p><input type="checkbox"/> 中文</p> <p><input type="checkbox"/> 英文</p> <p><input type="checkbox"/> 中英文都用</p> <p><input type="checkbox"/> 其他语言，请详述: _____</p> |
|------------------------------|-----------------------------------------------------------------------------------------------------------------------------------------------------------------------------|

### 第二部分：关于您患有失智症的亲人的信息

|                      |                                                                                                                                                                                                                                                                                                                                |
|----------------------|--------------------------------------------------------------------------------------------------------------------------------------------------------------------------------------------------------------------------------------------------------------------------------------------------------------------------------|
| <b>请问您亲人的年龄是？</b>    | <p>(请填写)</p> <p><input type="checkbox"/> 岁</p>                                                                                                                                                                                                                                                                                 |
| <b>请问您亲人的婚姻状况是？</b>  | <p>(请只选择一项)</p> <p><input type="checkbox"/> 已婚，或有固定伴侣</p> <p><input type="checkbox"/> 未婚</p> <p><input type="checkbox"/> 丧偶</p> <p><input type="checkbox"/> 分居</p> <p><input type="checkbox"/> 离异</p> <p><input type="checkbox"/> 不希望回答</p>                                                                                    |
| <b>请问您亲人的受教育程度是？</b> | <p>(请只选择一项)</p> <p><input type="checkbox"/> 高中以下</p> <p><input type="checkbox"/> 高中学历，普通教育发展证书 (GED) 或其他同等文凭</p> <p><input type="checkbox"/> 读过大学未毕业，或副学士学位</p> <p><input type="checkbox"/> 本科学位</p> <p><input type="checkbox"/> 研究生学位、博士学位或专业学位</p> <p><input type="checkbox"/> 不希望回答</p> <p><input type="checkbox"/> 不清楚</p> |



|                                           |                                                                                                                                                                                                                                                                                                                  |
|-------------------------------------------|------------------------------------------------------------------------------------------------------------------------------------------------------------------------------------------------------------------------------------------------------------------------------------------------------------------|
| <p><b>您亲人目前的工作状况是?</b></p>                | <p><i>(请只选择一项)</i></p> <p><input type="checkbox"/> 全职工作</p> <p><input type="checkbox"/> 兼职工作</p> <p><input type="checkbox"/> 没有工作, 但正在找工作</p> <p><input type="checkbox"/> 在家庭之外没有工作</p> <p><input type="checkbox"/> 已退休</p> <p><input type="checkbox"/> 不希望回答</p> <p><input type="checkbox"/> 其他, 请详述: _____</p> |
| <p><b>在过去的 12 个月中, 您亲人的总家庭收入大约多少?</b></p> | <p><i>(请只选择一项)</i></p> <p><input type="checkbox"/> &lt; \$35,000</p> <p><input type="checkbox"/> \$35,000 - \$99,999</p> <p><input type="checkbox"/> &gt; \$100,000</p> <p><input type="checkbox"/> 不希望回答</p> <p><input type="checkbox"/> 不清楚</p>                                                                |
| <p><b>请问您的亲人已经在美国居住了多少年?</b></p>          | <p><i>(请填空)</i></p> <p><input type="text"/> 年</p>                                                                                                                                                                                                                                                                |
| <p><b>哪一项最能描述您亲人的背景?</b></p>              | <p><i>(请只选择一项)</i></p> <p><input type="checkbox"/> 出生在美国, 并且在绝大多数时间居住于此</p> <p><input type="checkbox"/> 出生在美国, 但我成长在美国之外, 之后才回到美国生活</p> <p><input type="checkbox"/> 出生在美国之外, 后来因家庭、学业、工作或其他原因来到美国</p> <p><input type="checkbox"/> 其他, 请详述: _____</p>                                                             |
| <p><b>成长过程中, 您的亲人主要使用的是哪种语言?</b></p>      | <p><i>(请只选择一项)</i></p> <p><input type="checkbox"/> 中文</p> <p><input type="checkbox"/> 英文</p>                                                                                                                                                                                                                     |

|                        |                                                                                                                                                                                                                                                                                                         |
|------------------------|---------------------------------------------------------------------------------------------------------------------------------------------------------------------------------------------------------------------------------------------------------------------------------------------------------|
|                        | <input type="checkbox"/> 中英文都用<br><input type="checkbox"/> 其他语言, 请详述                                                                                                                                                                                                                                    |
| <b>请问您亲人目前有哪些医疗保险?</b> | <p>(请选择所有适合的选项)</p> <input type="checkbox"/> Medicare 联邦医疗保险 (红蓝卡)<br><input type="checkbox"/> Medicaid 联邦医疗补助 (白卡)<br><input type="checkbox"/> Long-term care health insurance 长期护理保险<br><input type="checkbox"/> 私人医疗保险<br><input type="checkbox"/> 没有医疗保险<br><input type="checkbox"/> 其他, 请详述: _____ |

非常感谢您完成背景调查问卷!

一直关怀、支持失智症亲人的您, 辛苦了! 如果您希望收到本研究的结果总结, 请勾选下面的选项, 我们会在结果总结发布时联系您。

**我希望收到本项研究的结果总结**

感谢您参与关爱研究! 祝您与您的亲人一切安好!

[退出问卷]

### 背景問卷（繁體中文版）

感謝您參與訪談！現在，爲了更深入地瞭解您的經歷，我們將詢問您一些關於您和您患有失智症親人的背景信息。

#### 第一部分：關於您的信息

|             |                                                                                                                                     |
|-------------|-------------------------------------------------------------------------------------------------------------------------------------|
| 請問您的年齡是？    | (請填空)<br><br>[] 歲                                                                                                                   |
| 請問您的婚姻狀況是？  | (請只選擇一項)<br><br>[] 已婚，或有固定伴侶<br>[] 未婚<br>[] 喪偶<br>[] 分居<br>[] 離異<br>[] 不希望回答                                                        |
| 請問您的受教育程度是？ | (請只選擇一項)<br><br>[] 高中以下<br>[] 高中學歷，普通教育發展證書（GED）或其他同等文憑<br>[] 讀過大學未畢業，或副學士學位<br>[] 本科學位<br>[] 研究生學位、博士學位或專業學位<br>[] 不希望回答<br>[] 不清楚 |
| 您目前的工作狀況是？  | (請只選擇一項)<br><br>[] 全職工作                                                                                                             |

|                                 |                                                                                                                                                                                                                        |
|---------------------------------|------------------------------------------------------------------------------------------------------------------------------------------------------------------------------------------------------------------------|
|                                 | <input type="checkbox"/> 兼職工作<br><input type="checkbox"/> 沒有工作，但正在找工作<br><input type="checkbox"/> 在家庭之外沒有工作<br><input type="checkbox"/> 已退休<br><input type="checkbox"/> 不希望回答<br><input type="checkbox"/> 其他，請詳述：_____ |
| <b>在過去的 12 個月中，您的總家庭收入大約多少？</b> | <p>(請只選擇一項)</p> <input type="checkbox"/> < \$35,000<br><input type="checkbox"/> \$35,000 - \$99,999<br><input type="checkbox"/> > \$100,000<br><input type="checkbox"/> 不希望回答<br><input type="checkbox"/> 不清楚          |
| <b>請問您已經在美國居住了多少年？</b>          | <p>(請填空)</p> <input type="text"/> 年                                                                                                                                                                                    |
| <b>哪一項最能描述您的背景？</b>             | <p>(請只選擇一項)</p> <input type="checkbox"/> 我出生在美國，並且絕大多數時間居住於此<br><input type="checkbox"/> 我出生在美國，但我成長在美國之外，之後纔回到美國生活<br><input type="checkbox"/> 我出生在美國之外，後來因家庭、學業、工作或其他原因來到美國<br><input type="checkbox"/> 其他，請詳述：_____ |
| <b>成長過程中，您主要使用的是哪種語言？</b>       | <p>(請只選擇一項)</p> <input type="checkbox"/> 中文<br><input type="checkbox"/> 英文<br><input type="checkbox"/> 中英文都用<br><input type="checkbox"/> 其他語言，請詳述：_____                                                                |

|                              |                                                                                                                                                                             |
|------------------------------|-----------------------------------------------------------------------------------------------------------------------------------------------------------------------------|
| <b>您與醫護人員交流時，主要使用的是哪種語言？</b> | <p>(請只選擇一項)</p> <p><input type="checkbox"/> 中文</p> <p><input type="checkbox"/> 英文</p> <p><input type="checkbox"/> 中英文都用</p> <p><input type="checkbox"/> 其他語言，請詳述: _____</p> |
|------------------------------|-----------------------------------------------------------------------------------------------------------------------------------------------------------------------------|

### 第二部分：关于您患有失智症的亲人的信息

|                      |                                                                                                                                                                                                                                                                                                                                |
|----------------------|--------------------------------------------------------------------------------------------------------------------------------------------------------------------------------------------------------------------------------------------------------------------------------------------------------------------------------|
| <b>請問您親人的年齡是？</b>    | <p>(請填空)</p> <p><input type="checkbox"/> 歲</p>                                                                                                                                                                                                                                                                                 |
| <b>請問您親人的婚姻狀況是？</b>  | <p>(請只選擇一項)</p> <p><input type="checkbox"/> 已婚，或有固定伴侶</p> <p><input type="checkbox"/> 未婚</p> <p><input type="checkbox"/> 喪偶</p> <p><input type="checkbox"/> 分居</p> <p><input type="checkbox"/> 離異</p> <p><input type="checkbox"/> 不希望回答</p>                                                                                    |
| <b>請問您親人的受教育程度是？</b> | <p>(請只選擇一項)</p> <p><input type="checkbox"/> 高中以下</p> <p><input type="checkbox"/> 高中學歷，普通教育發展證書 (GED) 或其他同等文憑</p> <p><input type="checkbox"/> 讀過大學未畢業，或副學士學位</p> <p><input type="checkbox"/> 本科學位</p> <p><input type="checkbox"/> 研究生學位、博士學位或專業學位</p> <p><input type="checkbox"/> 不希望回答</p> <p><input type="checkbox"/> 不清楚</p> |

|                                           |                                                                                                                                                                                                                                                                                                           |
|-------------------------------------------|-----------------------------------------------------------------------------------------------------------------------------------------------------------------------------------------------------------------------------------------------------------------------------------------------------------|
| <p><b>您親人目前的工作狀況是?</b></p>                | <p>(請只選擇一項)</p> <p><input type="checkbox"/> 全職工作</p> <p><input type="checkbox"/> 兼職工作</p> <p><input type="checkbox"/> 沒有工作, 但正在找工作</p> <p><input type="checkbox"/> 在家庭之外沒有工作</p> <p><input type="checkbox"/> 已退休</p> <p><input type="checkbox"/> 不希望回答</p> <p><input type="checkbox"/> 其他, 請詳述: _____</p> |
| <p><b>在過去的 12 個月中, 您親人的總家庭收入大約多少?</b></p> | <p>(請只選擇一項)</p> <p><input type="checkbox"/> &lt; \$35,000</p> <p><input type="checkbox"/> \$35,000 - \$99,999</p> <p><input type="checkbox"/> &gt; \$100,000</p> <p><input type="checkbox"/> 不希望回答</p> <p><input type="checkbox"/> 不清楚</p>                                                                |
| <p><b>請問您的親人已經在美國居住了多少年?</b></p>          | <p>(請填空)</p> <p><input type="text"/> 年</p>                                                                                                                                                                                                                                                                |
| <p><b>哪一項最能描述您親人的背景?</b></p>              | <p>(請只選擇一項)</p> <p><input type="checkbox"/> 我出生在美國, 並且絕大多數時間居住於此</p> <p><input type="checkbox"/> 我出生在美國, 但我成長在美國之外, 之後纔回到美國生活</p> <p><input type="checkbox"/> 我出生在美國之外, 後來因家庭、學業、工作或其他原因來到美國</p> <p><input type="checkbox"/> 其他, 請詳述: _____</p>                                                           |
| <p><b>成長過程中, 您的親人主要使用的是哪種語言?</b></p>      | <p>(請只選擇一項)</p> <p><input type="checkbox"/> 中文</p> <p><input type="checkbox"/> 英文</p>                                                                                                                                                                                                                     |

|                               |                                                                                                                                                                                                                                                                                                               |
|-------------------------------|---------------------------------------------------------------------------------------------------------------------------------------------------------------------------------------------------------------------------------------------------------------------------------------------------------------|
|                               | <input type="checkbox"/> 中英文都用<br><input type="checkbox"/> 其他語言，請詳述: _____                                                                                                                                                                                                                                    |
| <p><b>請問您親人目前有哪些醫療保險?</b></p> | <p><i>(請選擇所有適合的選項)</i></p> <input type="checkbox"/> Medicare 聯邦醫療保險 (紅藍卡)<br><input type="checkbox"/> Medicaid 聯邦醫療補助 (白卡)<br><input type="checkbox"/> Long-term care health insurance 長期護理保險<br><input type="checkbox"/> 私人醫療保險<br><input type="checkbox"/> 沒有醫療保險<br><input type="checkbox"/> 其他，請詳述: _____ |

非常感謝您完成背景調查問卷!

一直關懷、支持失智症親人的您，辛苦了！如果您希望收到本研究的結果總結，請勾選下面的選項，我們會在結果總結發布時聯繫您。

**我希望收到本項研究的結果總結**

感謝您參與關愛研究！祝您與您的親人一切安好！

[退出問卷]
